# Supplementary material for: Viral nucleoprotein antibodies activate TRIM21 and induce T cell immunity
Source: PubMed Central journal article supplement (PMC7917548; doi:10.15252/embj.2020106228), 2020-12-01

WB for LCMV N protein

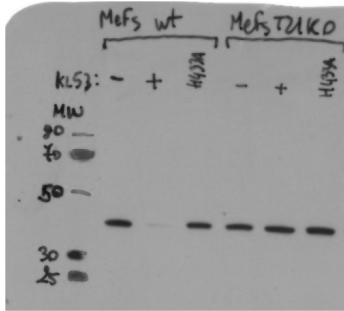

WB for Vinculin

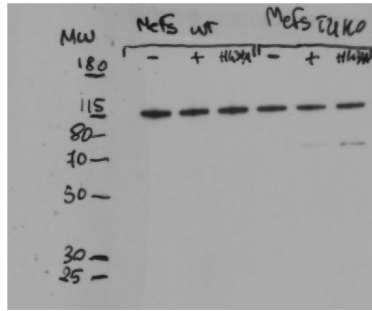

Supplement: EMBJ-40-e106228-s002.pdf [file EMBJ-40-e106228-s002.pdf]
